# Supplementary material for: Possible malfunction in widely used methane sampler deserves attention but poses limited implications for supply chain emission estimates
Source: Oxford University Press journal article supplement (doi:10.12952/journal.elementa.000137), 2016-01-01
Supplement: elementa_000137_s003.docx [file elementa_000137_s003.docx]

Table 1. Mean and median absolute emission rates (standard cubic feet per minute; scfm) and proportional loss rates (% of site-produced CH4) of EL subsets with site gas composition greater or less than 91% and 97% CH4. Proportional loss rates (percent of a site’s total produced CH4 that is emitted) are calculated by dividing individual absolute emission rates reported in the EL dataset of Allen et al (2013) by the corresponding site-specific gas production and %CH4 gas composition.

| %CH4 | mean absolute emission rate (scfm CH4) | median absolute emission rate (scfm CH4) | mean proportional loss rate (%) | median proportional loss rate (%) |
| --- | --- | --- | --- | --- |
| >91% | 0.15 | 0.04 | 0.03% | 0.0007% |
| <91% | 0.05 | 0.01 | 0.20% | 0.005% |
| >97% | 0.19 | 0.03 | 0.01% | 0.0004% |
| <97% | 0.07 | 0.02 | 0.14% | 0.003% |
