# Supplementary material for: Possible malfunction in widely used methane sampler deserves attention but poses limited implications for supply chain emission estimates
Source: Oxford University Press journal article supplement (doi:10.12952/journal.elementa.000137), 2016-01-01
Supplement: elementa_000137_s004.docx [file elementa_000137_s004.docx]

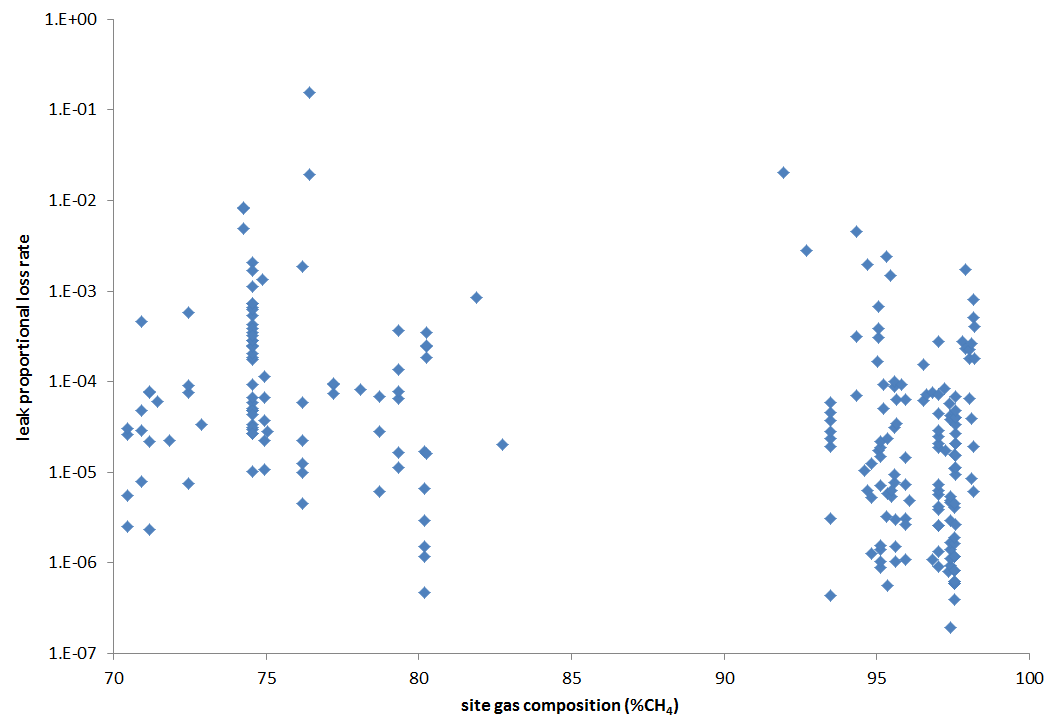


Figure S1. Proportional loss rates of individual equipment leaks as a function of site %CH4. Data points with missing production data or zero emission rates are excluded.
