# Supplementary material for: Possible malfunction in widely used methane sampler deserves attention but poses limited implications for supply chain emission estimates
Source: Oxford University Press journal article supplement (doi:10.12952/journal.elementa.000137), 2016-01-01
Supplement: elementa_000137_s006.docx [file elementa_000137_s006.docx]

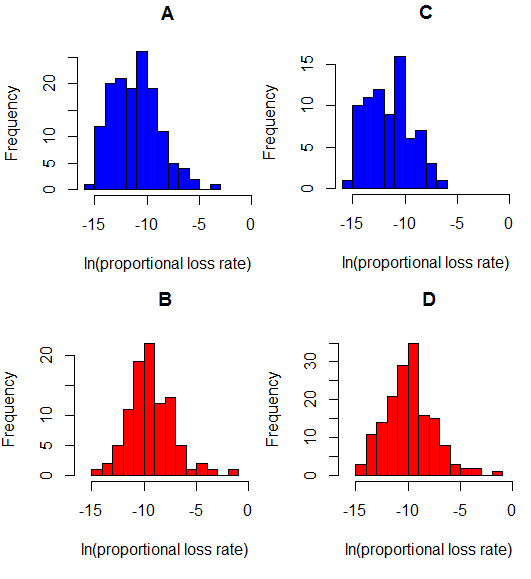


Figure S3. Histograms of EL proportional loss rates at low % CH4 vs. high % CH4 sites (paired comparisons are stacked vertically): A. >91% CH4; B. <91% CH4; C. >97% CH4; D. <97% CH4.
